# Supplementary material for: Synthesis of polypyrrole–titanium dioxide brush-like nanocomposites with enhanced supercapacitive performance
Source: Royal Society of Chemistry journal article supplement (doi:10.1039/c4ra10680f), 2014-01-01
Supplement: c4ra10680f1.pdf [file c4ra10680f1.pdf]

# Electronic Supplementary Information

## Synthesis of polypyrrole-titanium dioxide brush-like nanocomposites with enhanced supercapacitive performance

Yan Gao,† Yanzhou Wang,† Xin Xu,\* Kun Ding and Demei Yu\*

*Department of Applied Chemistry, School of Science, Xi'an Jiaotong University, Xi'an 710049, China.  
†Yan Gao and Yanzhou Wang contributed equally to this work.*

*\*CORRESPONDING AUTHOR E-mail: ([xu.xin@stu.xjtu.edu.cn](mailto:xu.xin@stu.xjtu.edu.cn);  
[dmyu@mail.xjtu.edu.cn](mailto:dmyu@mail.xjtu.edu.cn))*

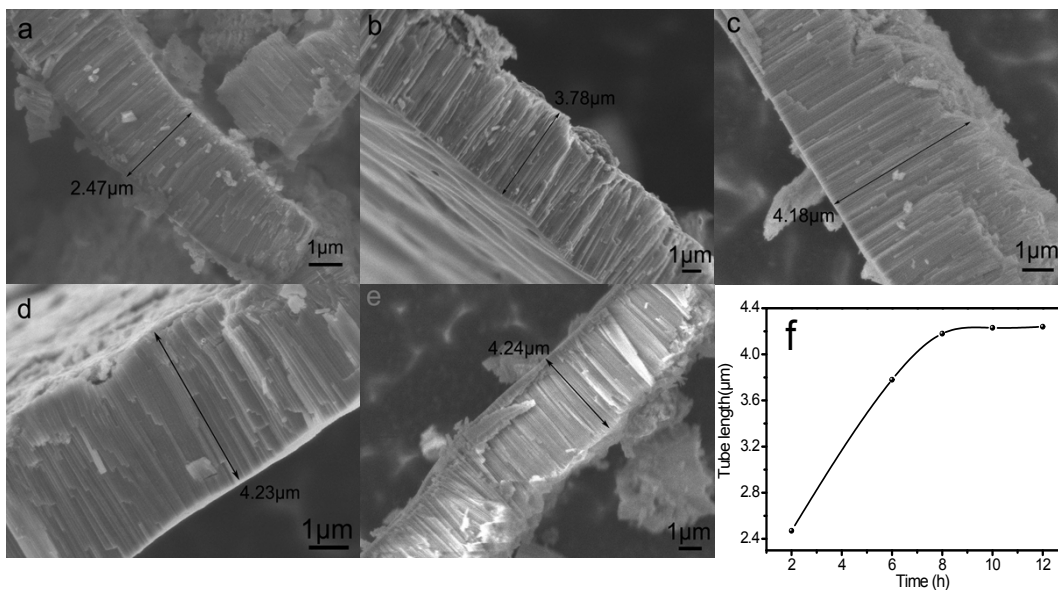

Fig.S1. SEM images of TiO<sub>2</sub> nanotube arrays under different anodization time. (a) 2 h, (b) 6 h, (c) 8 h, (d)10 h and (e) 12 h. (f) a diagram showing the relationship between tube length and anodization time.

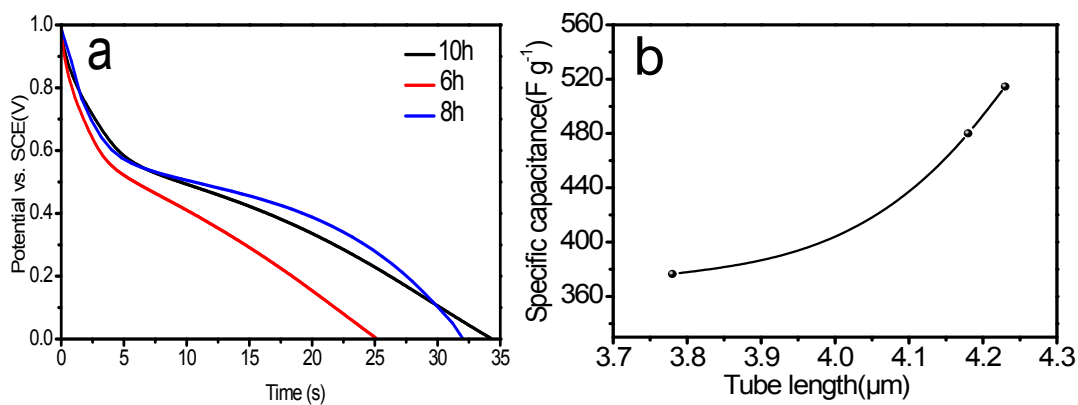

Fig.S2. (a) Galvanostatic discharge curves of TiO<sub>2</sub> based PPy/TiO<sub>2</sub> composites with different anodization time at the current density of 15 A g<sup>-1</sup>. (b) A diagram showing the relationship between tube length of the TiO<sub>2</sub> nanotube array and specific capacitance of the PPy/TiO<sub>2</sub> nanocomposite.

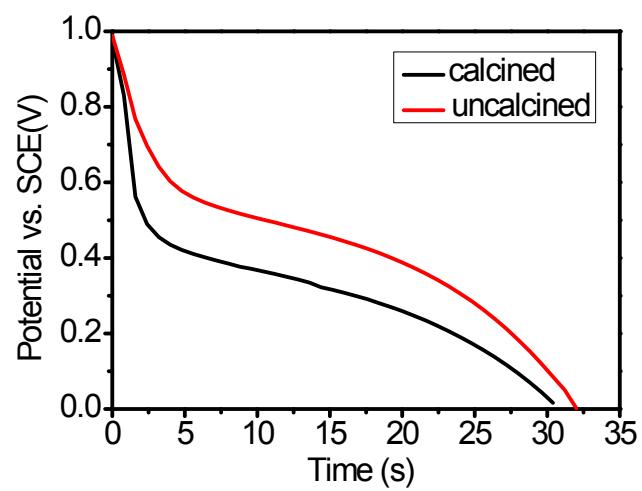

Fig.S3. Galvanostatic discharge curves of calcined and uncalcined  $\text{TiO}_2$  based composites at the current density of  $15 \text{ A g}^{-1}$ .
